# Supplementary material for: Heterostructured g-CN/TiO2 Photocatalysts Prepared by Thermolysis of g-CN/MIL-125(Ti) Composites for Efficient Pollutant Degradation and Hydrogen Production
Source: PubMed Central journal article supplement (PMC7407120; doi:10.3390/nano10071387), 2020-07-16
Supplement: nanomaterials-10-01387-s001.pdf [file nanomaterials-10-01387-s001.pdf]

# Heterostructured g-CN/TiO<sub>2</sub> Photocatalysts Prepared by Thermolysis of g-CN/MIL-125(Ti) Composites for Efficient Pollutant Degradation and Hydrogen Production

Batukhan Tatykayev <sup>1,2</sup>, Bilel Chouchene <sup>1</sup>, Lavinia Balan <sup>3</sup>, Thomas Gries <sup>4</sup>, Ghouti Medjahdi <sup>4</sup>, Emilien Girot <sup>1</sup>, Bolat Uralbekov <sup>2</sup> and Raphaël Schneider <sup>1,\*</sup>

<sup>1</sup> Université de Lorraine, CNRS, LRGP, F-54000 Nancy, France; b.tatykayev@gmail.com (B.T.); bilel.chouchene@univ-lorraine.fr (B.C.); emilien.girot@univ-lorraine.fr (E.G.)

<sup>2</sup> Department of General and Inorganic Chemistry, Al-Farabi Kazakh National University, Al-Farabi Av., 71, Almaty 050040, Kazakhstan; bulat.ural@gmail.com

<sup>3</sup> Conditions Extrêmes et Matériaux : Haute Température et Irradiation, UPR 3079 CNRS, Site Haute Température, 1D avenue de la Recherche Scientifique, 45071 Orléans, France; lavinia.balan@cnrs-orleans.fr

<sup>4</sup> Université de Lorraine, CNRS, IJL, F-54000 Nancy, France; thomas.gries@univ-lorraine.fr (T.G.); ghouti.medjahdi@univ-lorraine.fr (G.M.)

\* Correspondence: raphael.schneider@univ-lorraine.fr; Tel.: +33-3 78 74 37

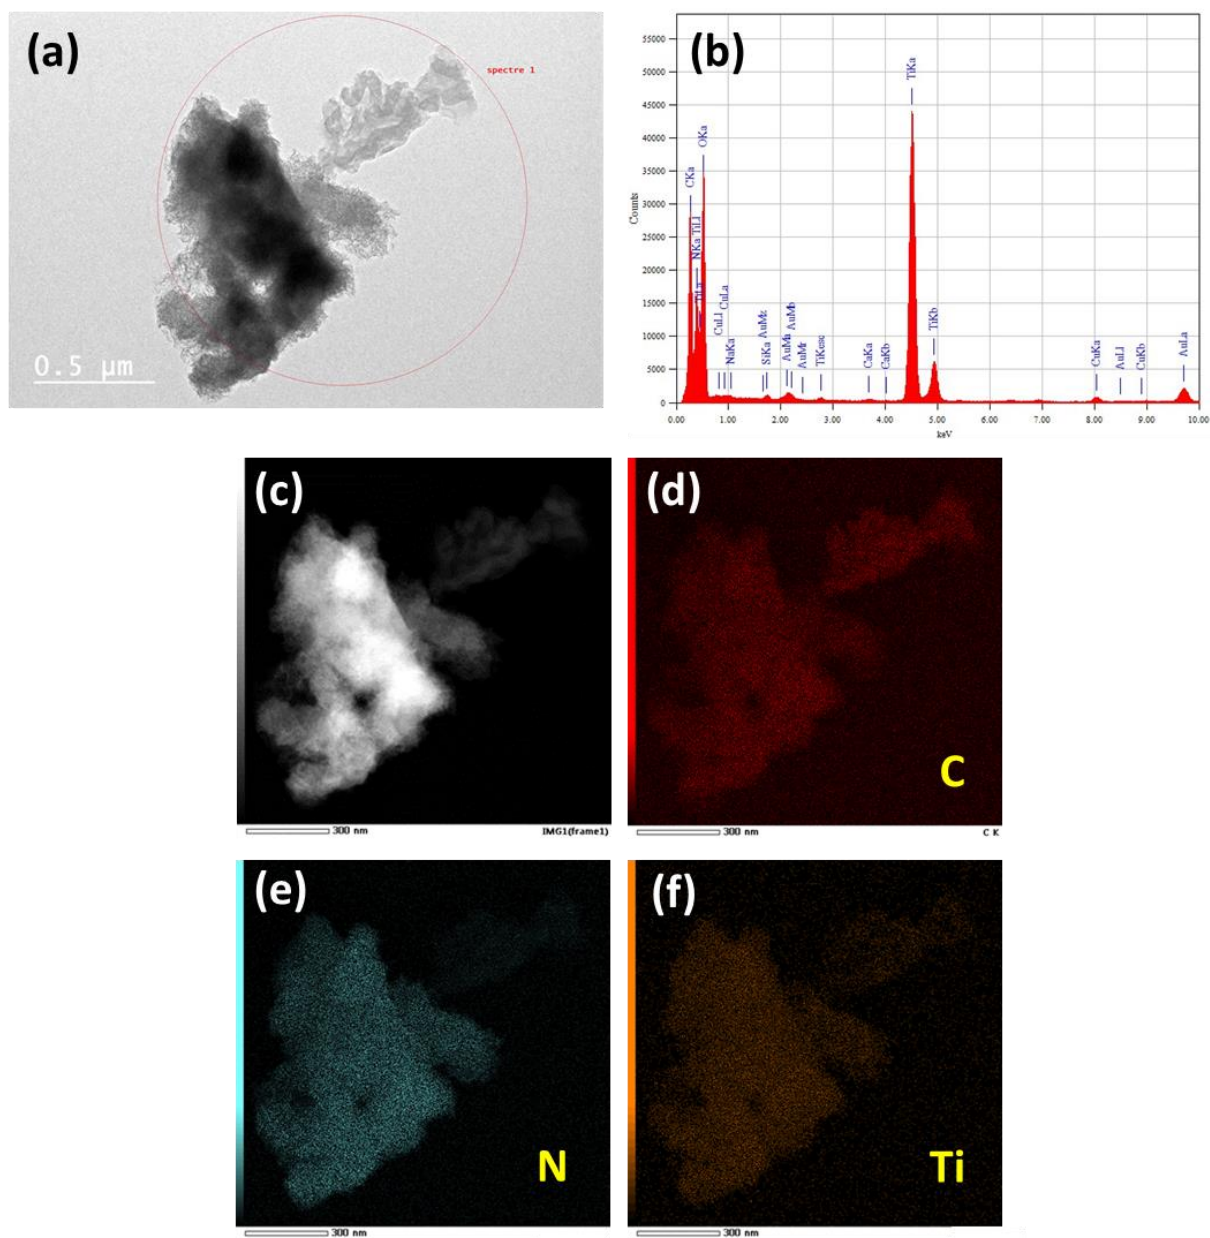

**Figure S1.** (a) SEM image, (b) EDX analysis and (c-f) EDX mapping of the g-CN/MIL-125(Ti) (3 : 2) composite.

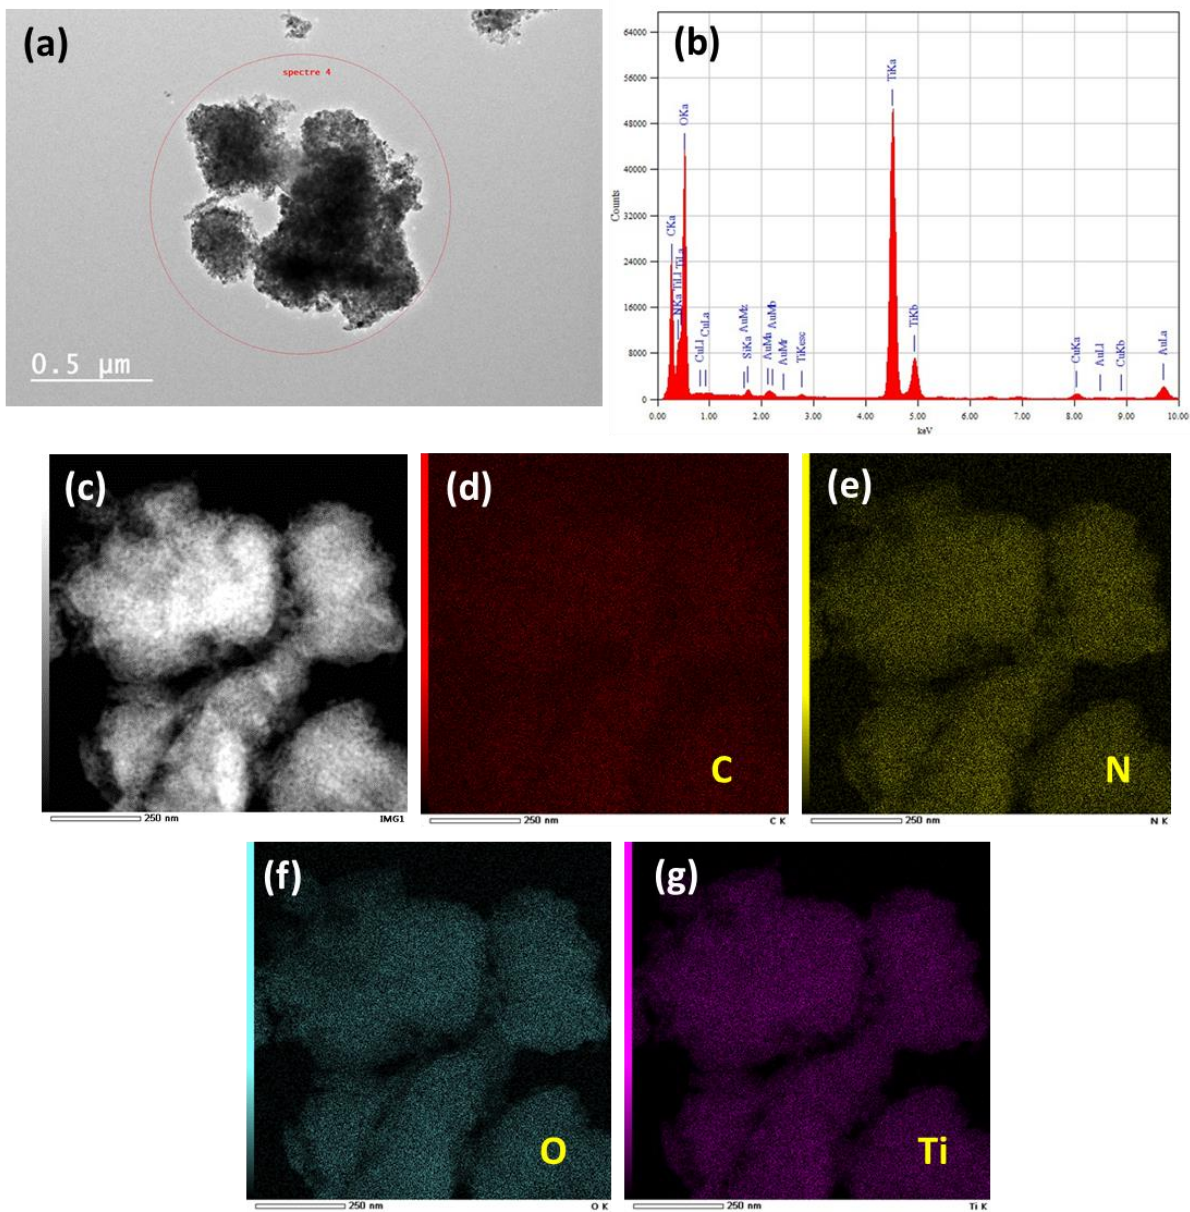

**Figure S2.** (a) SEM image, (b) EDX analysis and (c-g) EDX mapping of the g-CN/TiO<sub>2</sub> (3:1) composite.

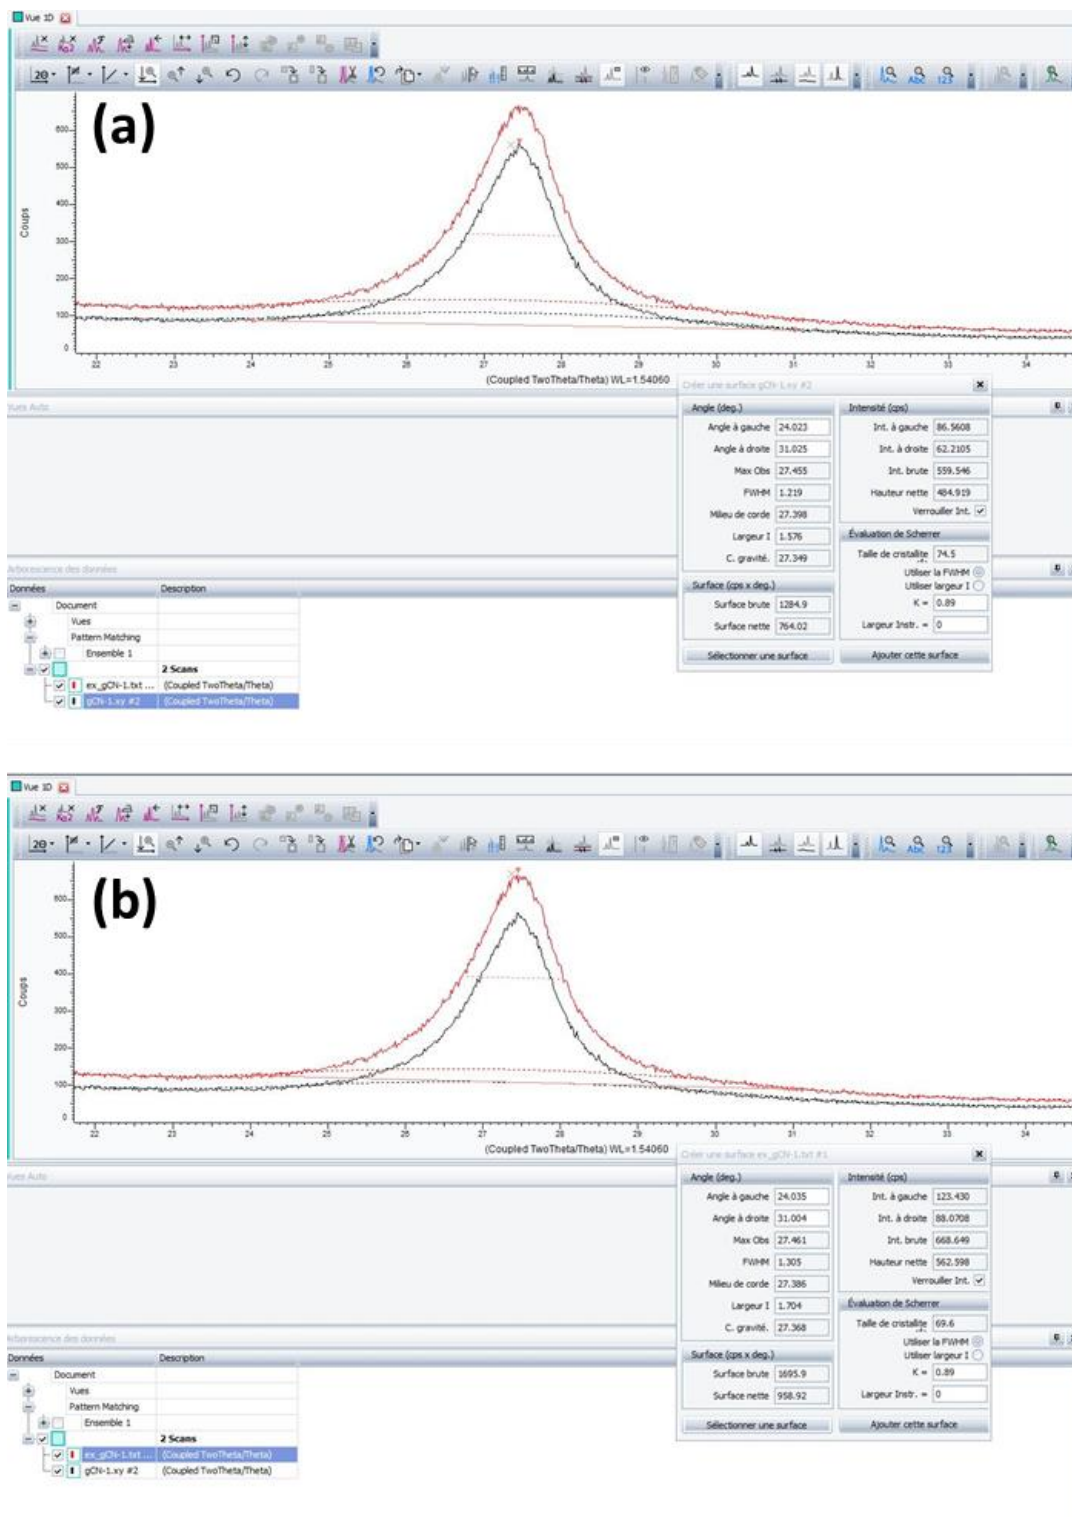

**Figure S3.** XRD analysis of the (002) peak for (a) bulk g-CN and (b) exfoliated g-CN using the DIFFRAC.EVA software from Bruker.

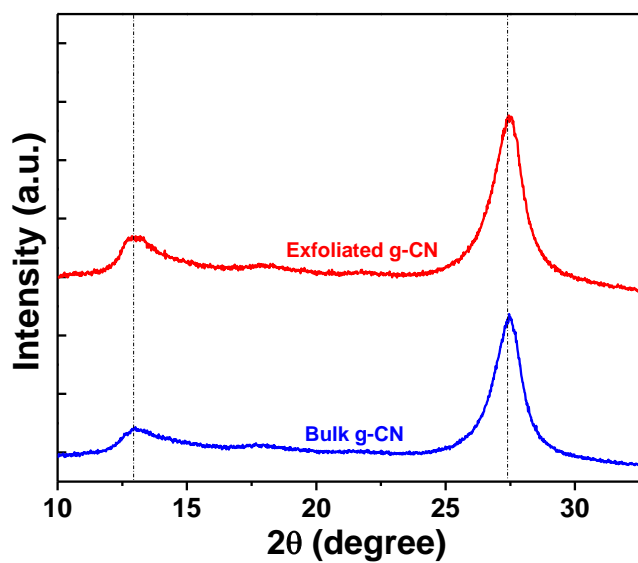

Figure S4. XRD patterns of bulk and exfoliated g-CN.

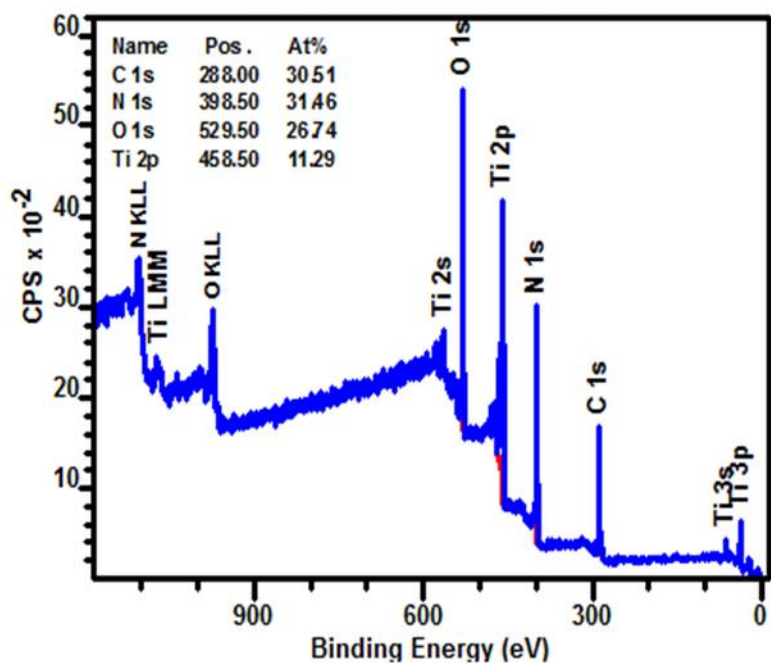

Figure S5. XPS survey spectrum of the g-CN/TiO<sub>2</sub> (3:1) photocatalyst.

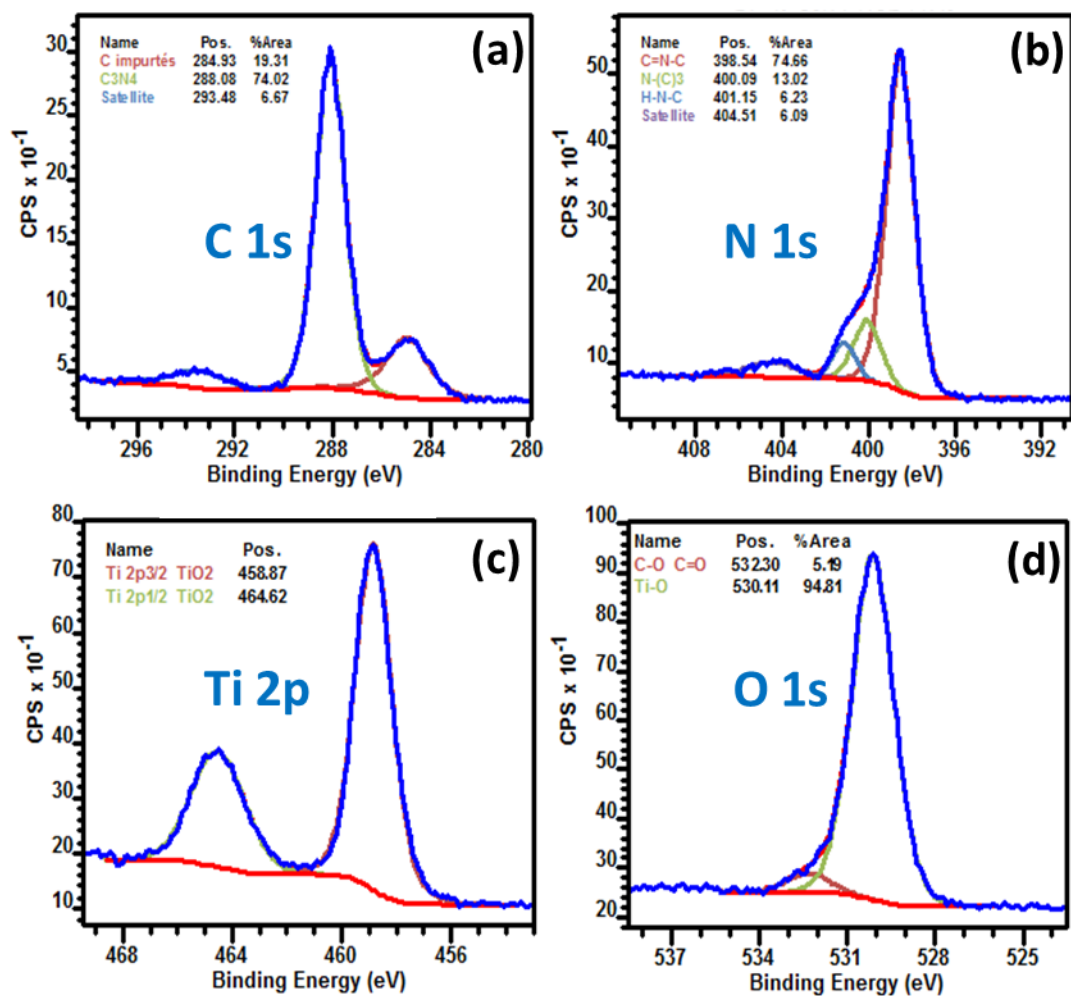

**Figure S6.** High resolution XPS spectra of (a) C 1s, (b) N 1s, (c) Ti 2p and (d) O 1s for the g-CN/TiO<sub>2</sub> (3:1) photocatalyst.



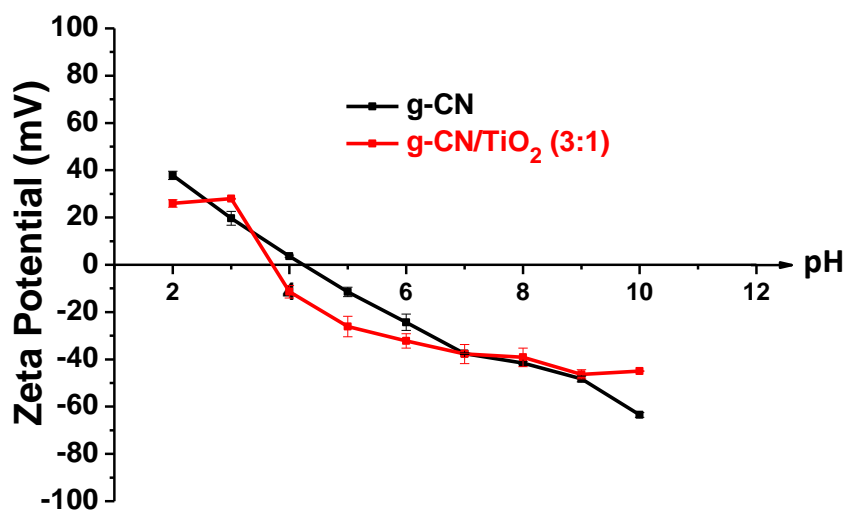

Figure S7. Zeta potentials of g-CN and g-CN/TiO<sub>2</sub> (3:1) photocatalysts as a function of pH.

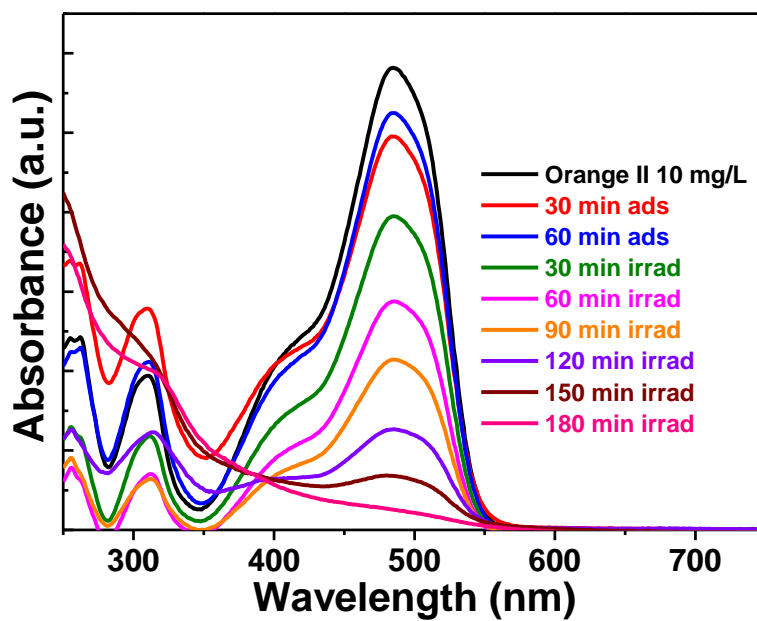

Figure S8. UV-vis spectrum changes of Orange II during its photodegradation by the g-CN/TiO<sub>2</sub> (3:1) composite.

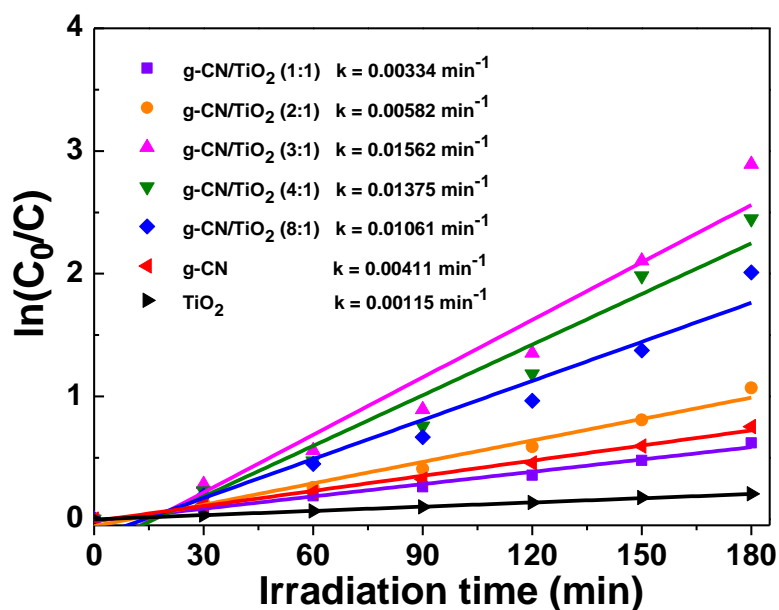

**Figure S9.** Pseudo-first-order kinetics fitted curves of Orange II degradation over TiO<sub>2</sub>, g-CN and g-CN/TiO<sub>2</sub> composites under visible light irradiation.

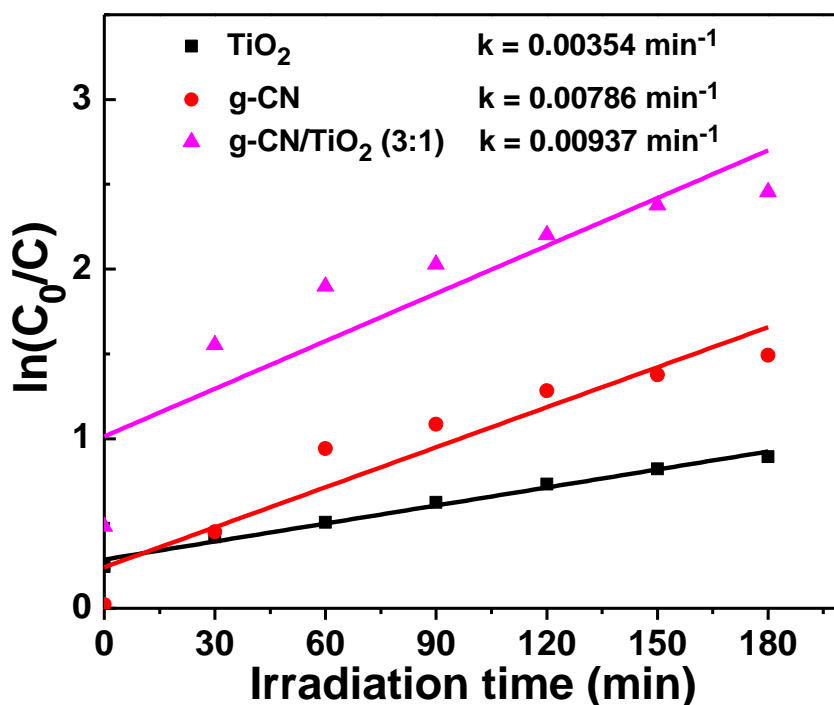

**Figure S10.** Pseudo-first-order kinetics fitted curves of tetracycline degradation over TiO<sub>2</sub>, g-CN and the g-CN/TiO<sub>2</sub> (3:1) composite under visible light irradiation.



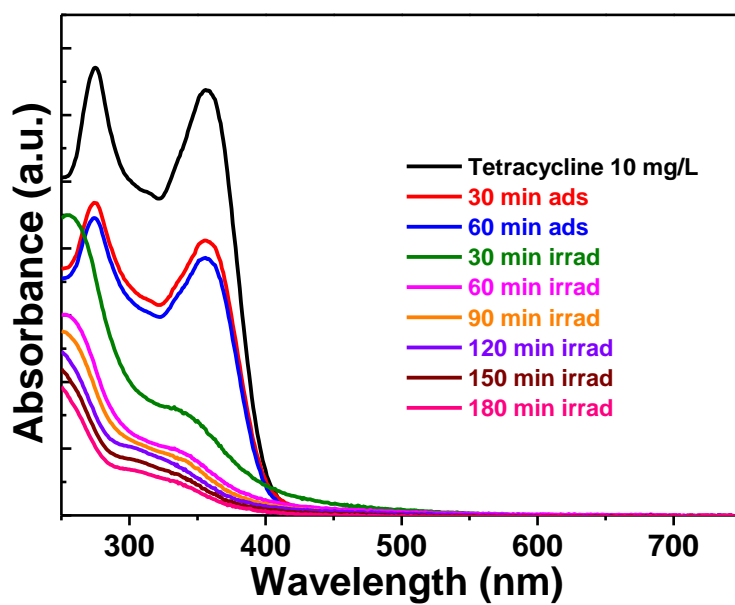

**Figure S11.** UV-vis spectrum changes of tetracycline during its photodegradation by the g-CN/TiO<sub>2</sub> (3:1) composite.

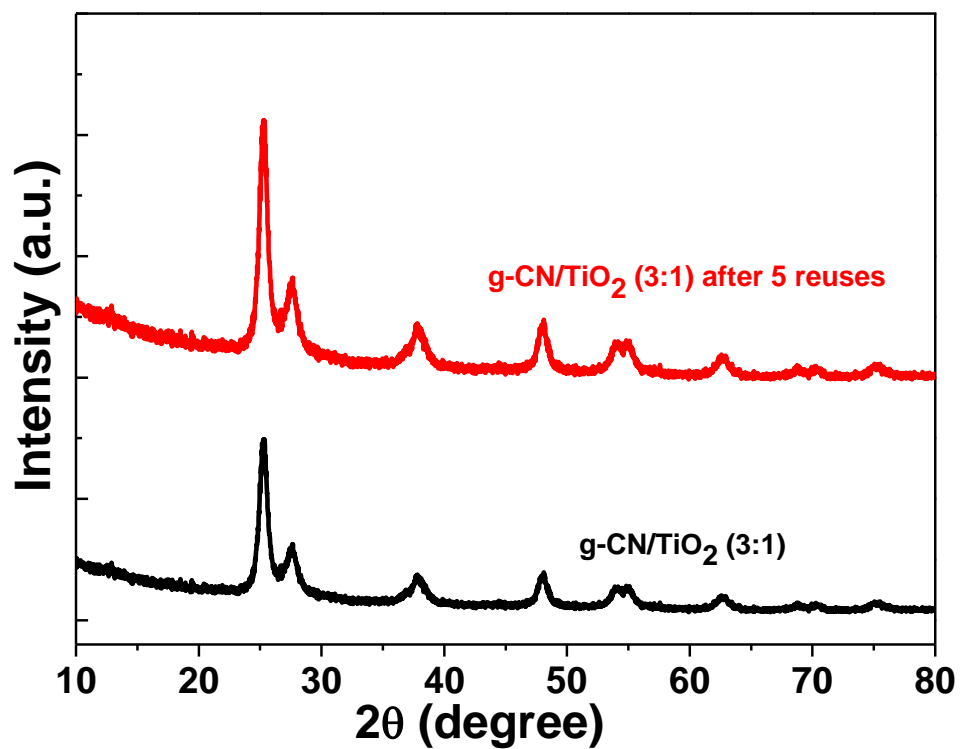

**Figure S12.** XRD patterns of the g-CN/TiO<sub>2</sub> (3:1) catalyst after synthesis (black line) and after 5 reuses for the degradation of the Orange II dye (red line).
